# Supplementary material for: Genetic Susceptibility, Diet Quality, and Two-Step Progression in Drusen Size
Source: PubMed Central journal article supplement — Invest Ophthalmol Vis Sci. 2020 May 14;61(5):17. doi: 10.1167/iovs.61.5.17 (PMC7405620; doi:10.1167/iovs.61.5.17), 2020-05-14
Supplement: iovs-61-5-17_s001.pdf [file iovs-61-5-17_s001.pdf]

Supplemental Figure 1. Kaplan–Meier curve for the probability of eyes progressing to larger drusen size (2 steps) by follow–up time. The survival estimates were obtained from the Kaplan–Meier survival curve.

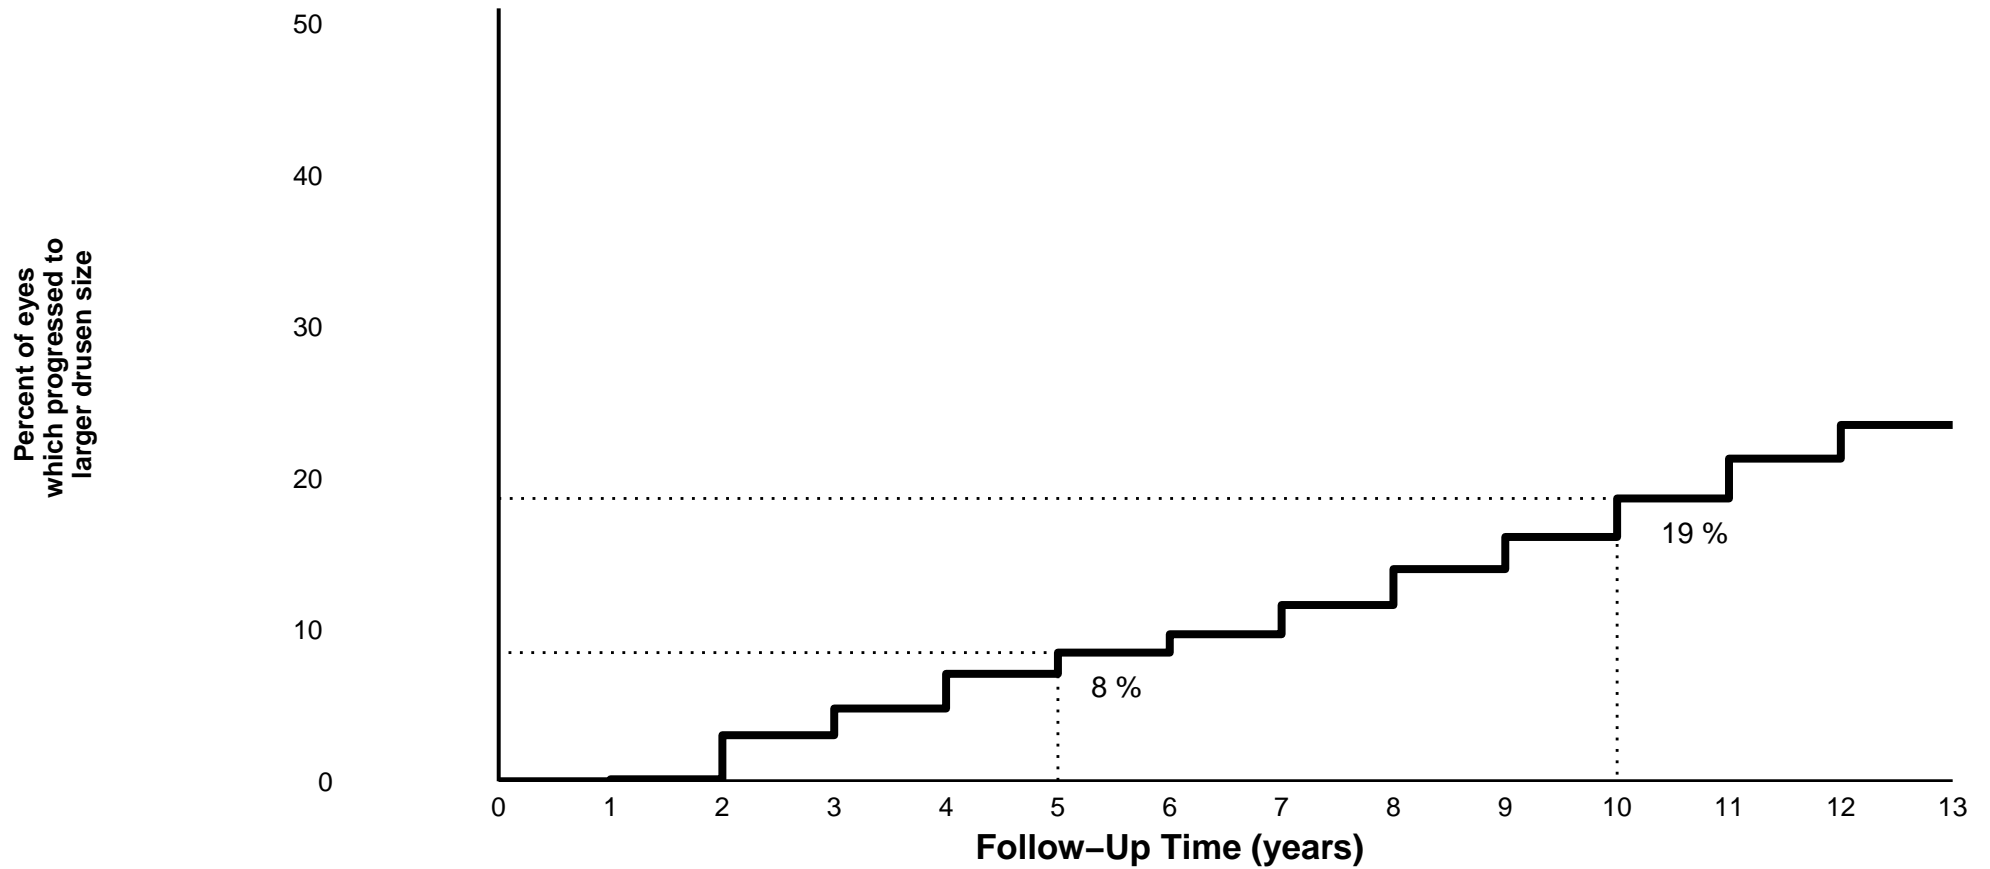

|                        |      |      |      |      |      |      |      |      |      |      |      |      |     |   |
|------------------------|------|------|------|------|------|------|------|------|------|------|------|------|-----|---|
| Number of eyes at risk | 3023 | 3019 | 2931 | 2874 | 2800 | 2750 | 2668 | 2521 | 2355 | 2215 | 2025 | 1287 | 446 | 0 |
| Number of progressors  | 0    | 4    | 88   | 53   | 69   | 42   | 36   | 55   | 65   | 56   | 63   | 43   | 13  | 0 |
